# Supplementary material
Source: Springer Nature journal article supplement (https://www.springermedizin.de/resource/supplementary/13041_2013_234_MOESM3_ESM.pdf/25657796)

### A Hippocampal CA3

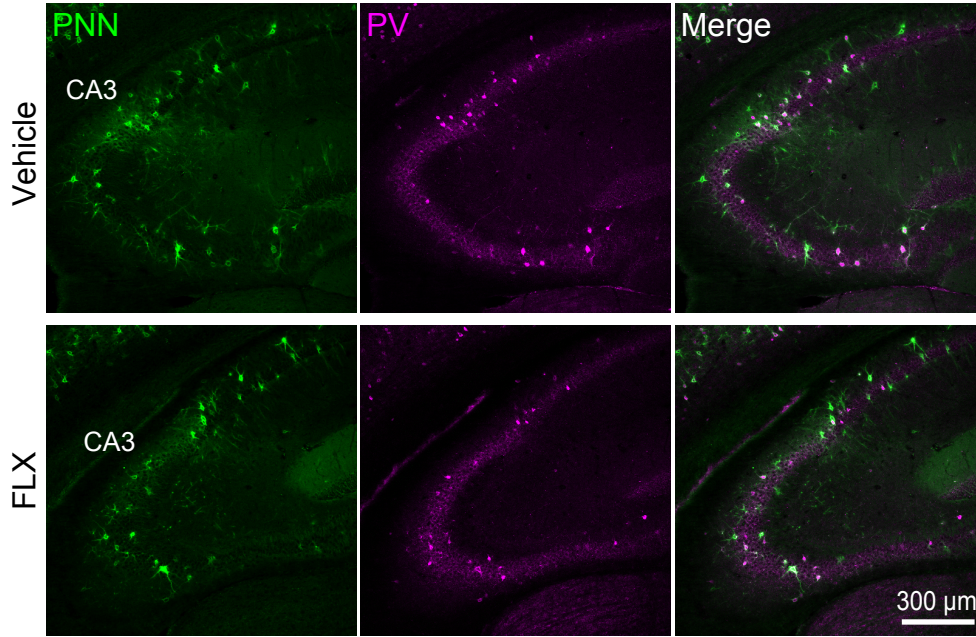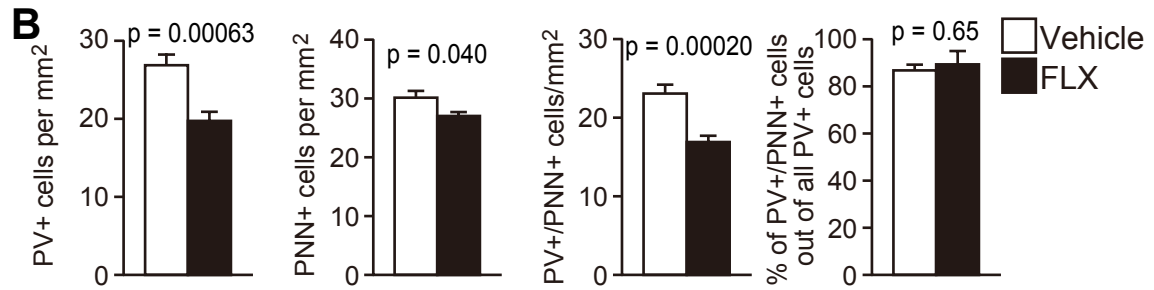

### C Reticular thalamic nucleus (RTN)

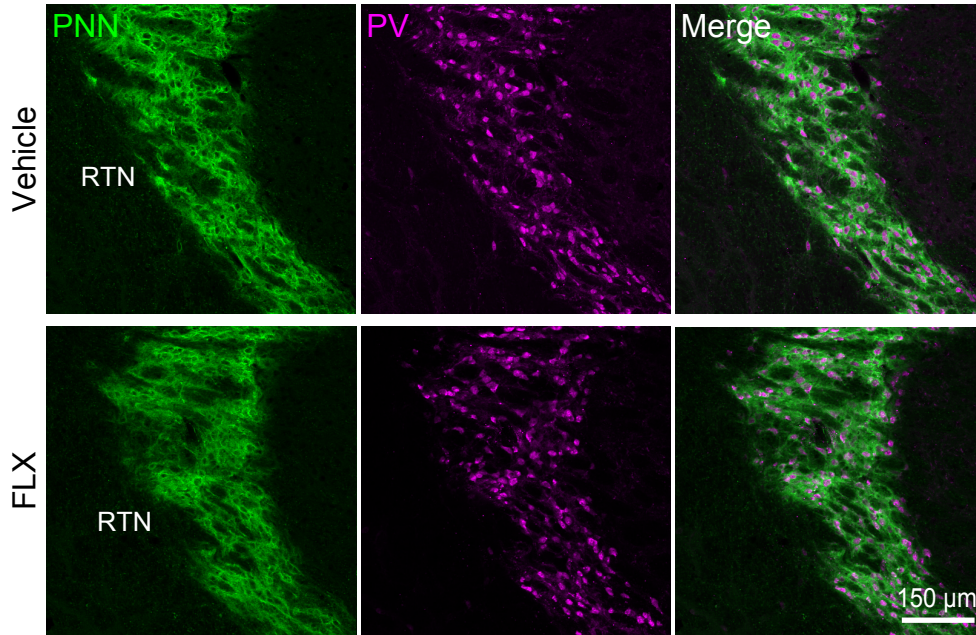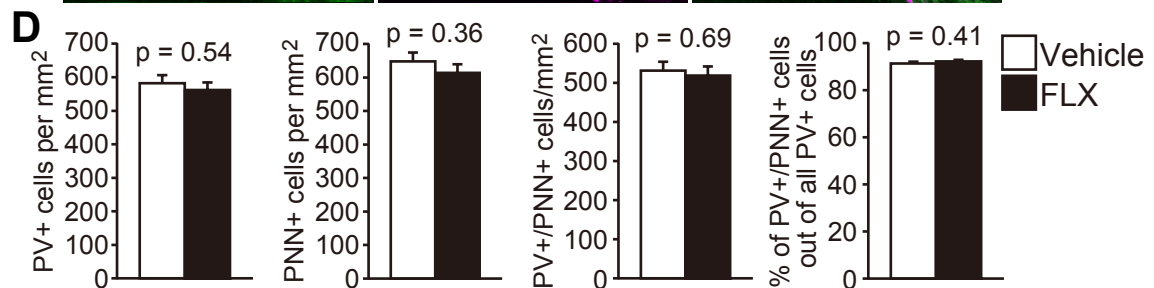

Figure 2

Supplement: MOESM3 [file 25657796]
